# Supplementary material for: VEGFR2 promotes central endothelial activation and the spread of pain in inflammatory arthritis
Source: PubMed Central journal article supplement (PMC6302073; doi:10.1016/j.bbi.2018.03.012), 2018-11

**a**

Day 11

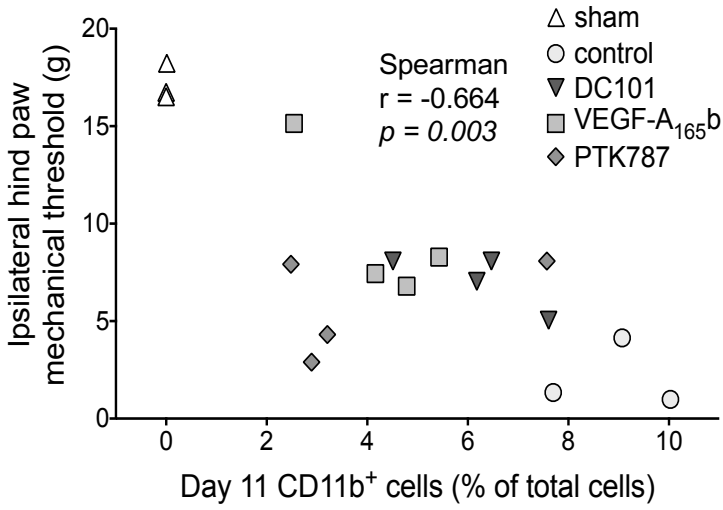**b**

Day 8

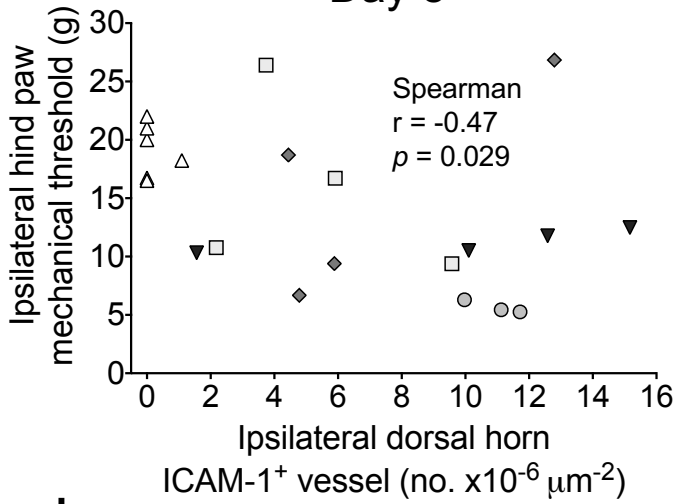**c**

Day 11

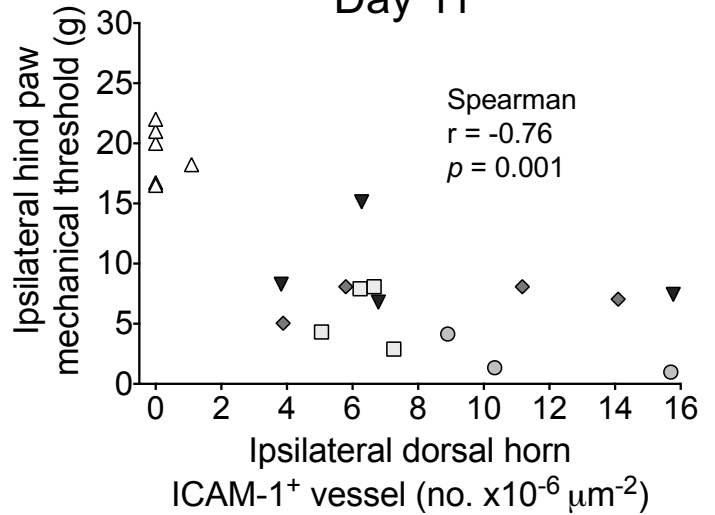**d**

Day 8

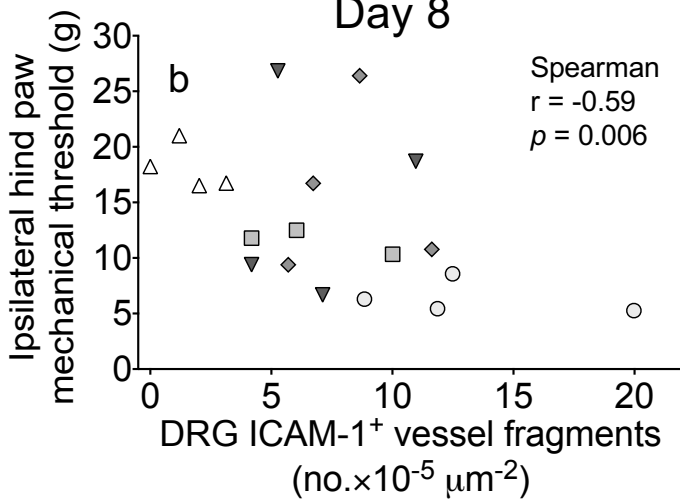**e**

Day 11

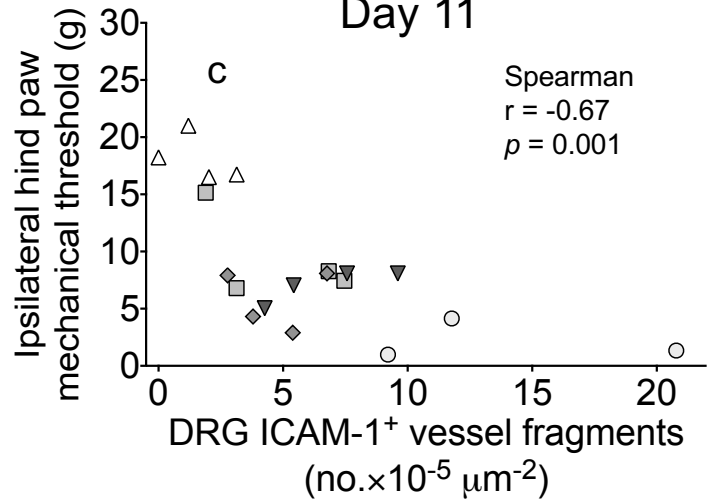

Supplement: mmc1.pdf [file mmc1.pdf]
