# Supplementary material for: VEGFR2 promotes central endothelial activation and the spread of pain in inflammatory arthritis
Source: PubMed Central journal article supplement (PMC6302073; doi:10.1016/j.bbi.2018.03.012), 2018-11

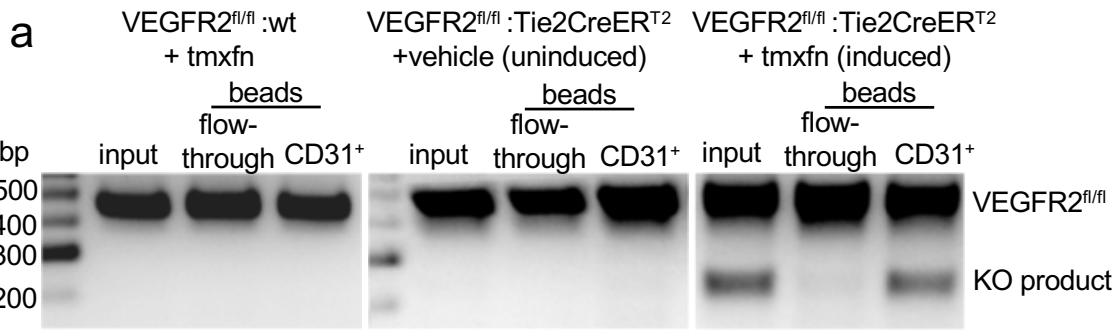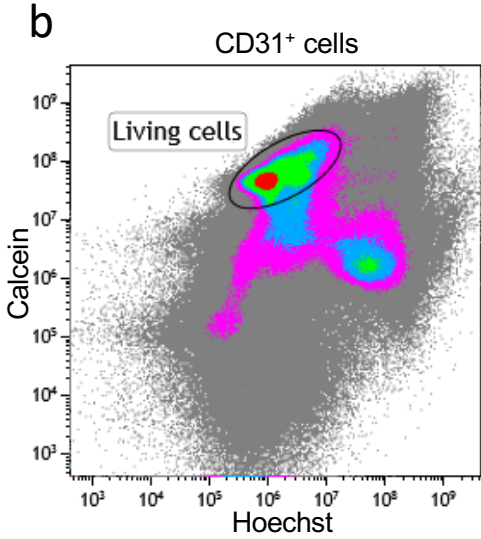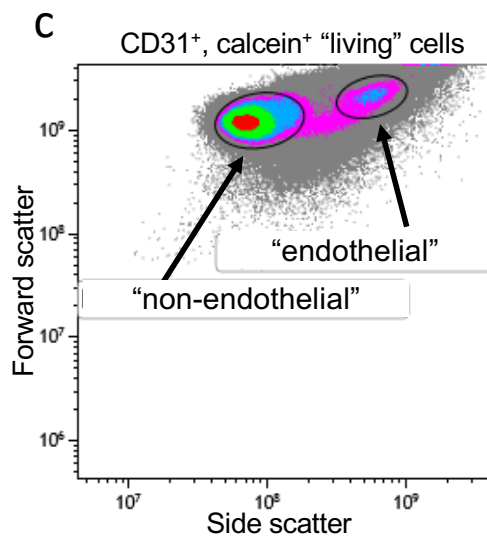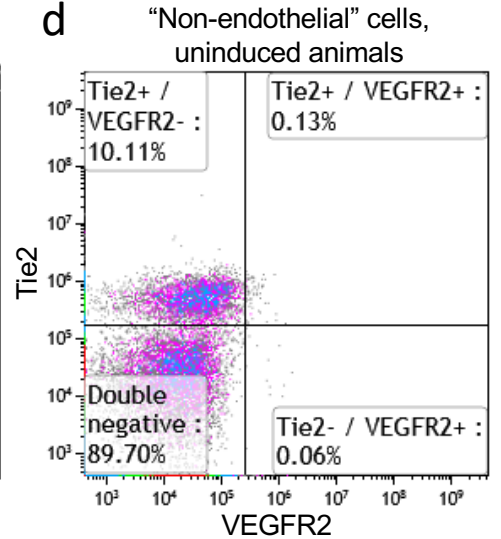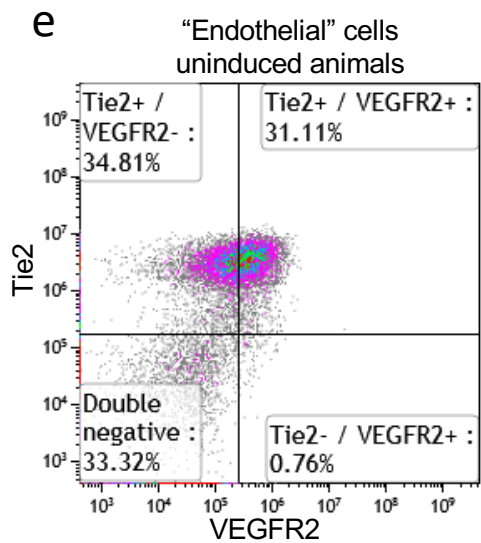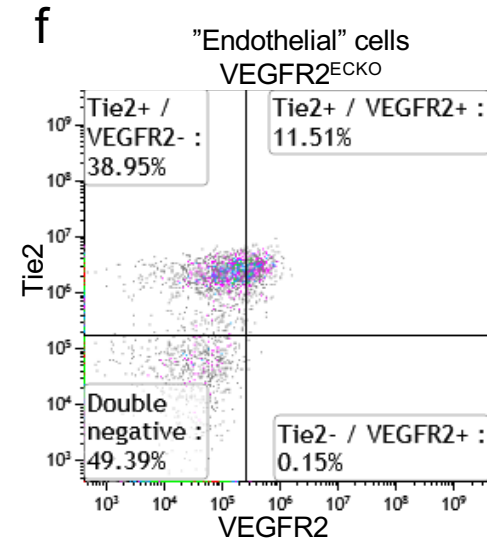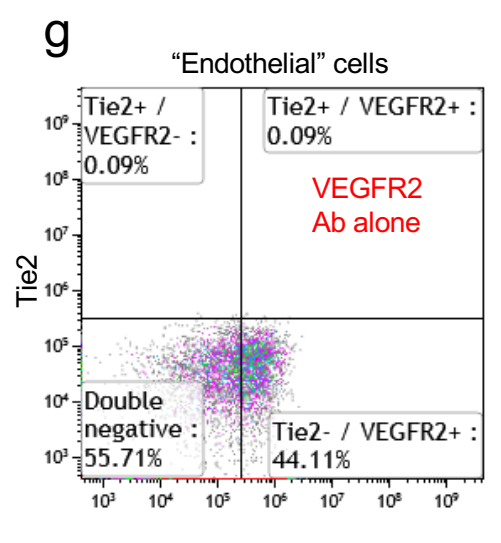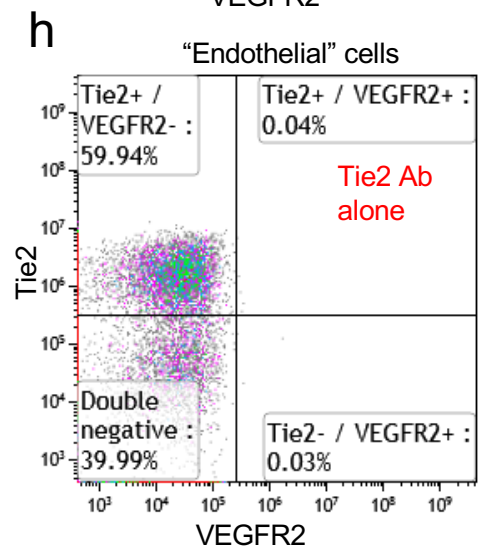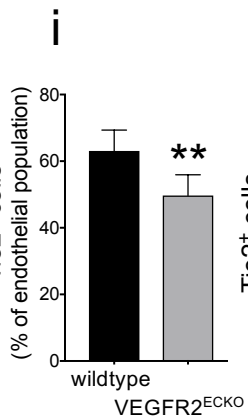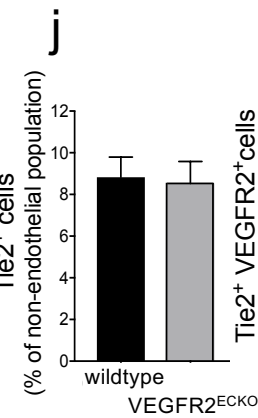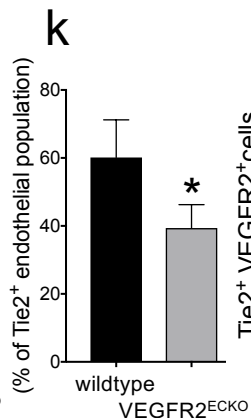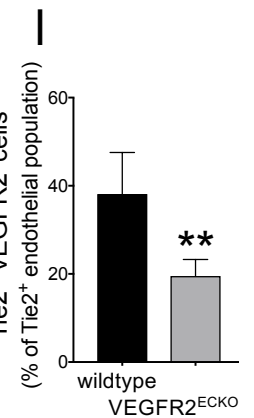

Supplement: mmc2.pdf [file mmc2.pdf]
